# Supplementary material
Source: PubMed Central journal article supplement (PMC3787119)

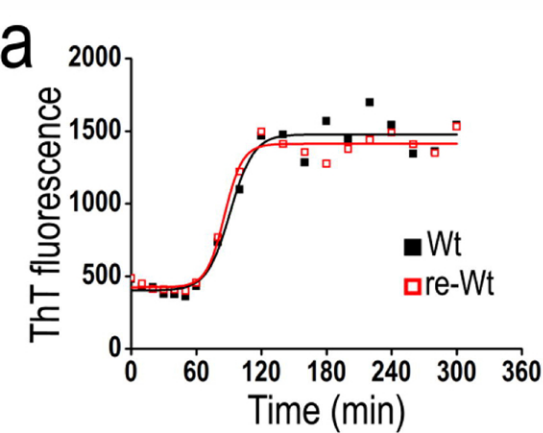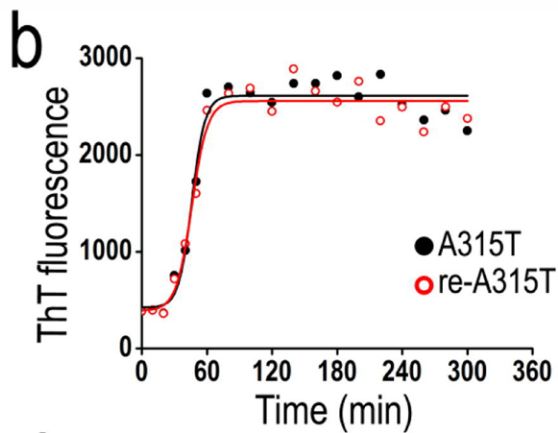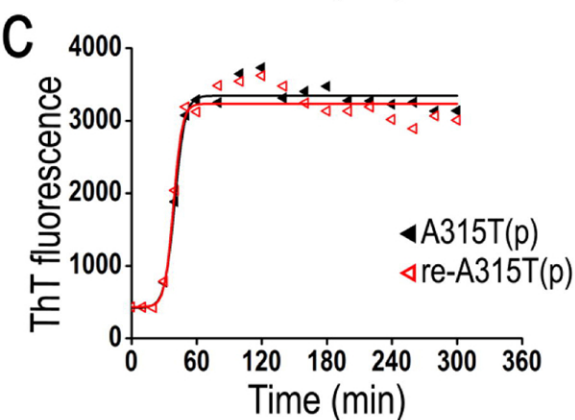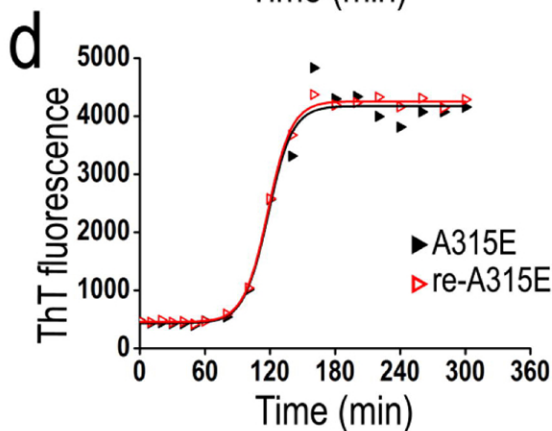

Supplement: NIHMS504222-supplement-Supplementary_Information.pdf [file NIHMS504222-supplement-Supplementary_Information.pdf]
